# Supplementary material for: Engineering HIV-Resistant Human CD4+ T Cells with CXCR4-Specific Zinc-Finger Nucleases
Source: PLoS Pathog. 2011 Apr 14;7(4):e1002020. doi: 10.1371/journal.ppat.1002020 (PMC3077364; doi:10.1371/journal.ppat.1002020)
Supplement: Table S1 — Deep sequencing results of cxcr4 disruptions. (XLS) [file ppat.1002020.s003.xls]

## Sheet: Sheet1
										In-frame to out-of-frame ratio			Most common disruptions induced by X4-ZFNs3
CCR5 genotype	Donors	# Reads	Day1	Ad5/F35 X4-ZFN MOI	HIV	%NHEJ	%Insertions	%Deletions	%Multiple2	Total	Deletions	Insertions	CXCR4Δ25	CXCR4Δ18	CXCR4Δ15	CXCR4Δ12	CXCR4Δ9	CXCR4Δ2	CXCR4+4
wt/wt	ND306	4940	5	300	Mock	10.8	1.6	8.4	0.7	0.93	1.29	0.09	0.01773	0.09453	0.0384	0.02954	0.0517	0.00295	0.0192
		4431	5	600	Mock	23.6	3.8	18.3	1.3	0.89	1.25	0.05	0.01178	0.12047	0.05163	0.00996	0.05163	0.01812	0.01812
		4772	5	1000	Mock	28.3	4.8	21.6	1.9	1	1.44	0.11	0.01897	0.09105	0.0569	0.02959	0.05008	0.02049	0.02959
wt/wt	ND335	4801	13	600	Mock	24.3	4.1	18.3	1.8	0.88	1.27	0.08	0.01347	0.11886	0.05784	0.0317	0.05784	0.01426	0.03487
		5080	13	600	Bk132	42.1	6.9	32.7	2.5	0.92	1.31	0.08	0.01606	0.13342	0.05087	0.03213	0.06247	0.01249	0.03793
		5108	13	600	HxB2	29	4.2	22.5	2.3	0.87	1.14	0.12	0.01451	0.13565	0.05174	0.02587	0.03785	0.01073	0.02776
		4902	13	600	R3A (1)	38.2	5.3	30.1	2.8	0.94	1.27	0.07	0.01778	0.1356	0.05688	0.02895	0.0452	0.00914	0.03047
		4546	13	600	R3A (2)	40.9	5.2	33	2.6	1.07	1.42	0.09	0.01486	0.14139	0.0707	0.03074	0.07377	0.01537	0.02818
wt/wt	ND221	3261	11	600	Mock	19.6	2.8	15.6	1	1.08	1.42	0.2	0.01499	0.11853	0.04496	0.0327	0.05858	0.0109	0.01771
		3979	18	600	Mock	19	2.8	15.4	0.8	0.98	1.39	0.11	0.00343	0.12815	0.06407	0.02746	0.04805	0.0103	0.02975
		3503	24	600	Mock	17.9	2.5	14.3	0.9	1.09	1.53	0.16	0.00412	0.14952	0.04527	0.03155	0.05075	0.01509	0.02332
		3291	11	600	Bk132	18.1	2.5	14.8	0.8	0.92	1.23	0.08	0.01445	0.13873	0.05202	0.03468	0.0578	0.01156	0.03468
		2832	18	600	Bk132	70.2	9.6	57.3	3.3	1.05	1.44	0.07	0.01835	0.14872	0.06567	0.0338	0.07098	0.01014	0.0338
		2475	24	600	Bk132	83.3	12.1	67.5	3.6	1.16	1.62	0.11	0.01265	0.15558	0.06935	0.0403	0.07357	0.01874	0.0314
		2997	11	600	HxB2	20.2	3.7	15.6	0.9	0.94	1.46	0.07	0.01156	0.11994	0.0448	0.03468	0.06792	0.01156	0.03613
		2839	18	600	HxB2	48.9	6.9	39.4	2.7	1.04	1.45	0.07	0.00815	0.13655	0.05774	0.0394	0.06861	0.01019	0.0197
		3070	24	600	HxB2	61.9	7.7	51.1	3.1	1.12	1.51	0.09	0.01458	0.14228	0.06737	0.04274	0.06536	0.01257	0.02011
		3640	11	600	R3A	21.5	2.6	17.9	1	1.06	1.44	0.09	0.00338	0.1295	0.05856	0.02815	0.06194	0.00901	0.02477
		2784	18	600	R3A	61.2	7.7	50	3.5	1.18	1.62	0.1	0.01064	0.15574	0.06667	0.04202	0.05994	0.00616	0.03137
		2793	24	600	R3A	75.4	9.5	62.4	3.5	1.21	1.63	0.11	0.01188	0.16773	0.05667	0.03976	0.07038	0.00868	0.01965
wt/wt	ND336	734	5	600	Mock	38.1	5.6	30.6	1.9	0.84	1.09	0.13	0.04153	0.10224	0.04473	0.01597	0.02875	0.00958	0.02556
		1924	16	600	Mock	28.8	3.7	23.2	1.8	0.74	0.94	0.09	0.03438	0.08438	0.07187	0.01875	0.01875	0.01094	0.02813
		1827	26	600	Mock	29.3	3.7	23.8	1.8	0.71	0.95	0	0.02663	0.10355	0.05128	0.02564	0.03057	0.01381	0.03057
		1636	16	600	Bk132	58.6	7.2	48.2	3.2	0.68	0.83	0.09	0.02564	0.08974	0.03846	0.02244	0.03526	0.01603	0.02885
		1587	26	600	Bk132	87.3	8.6	74.9	3.7	0.74	0.88	0.08	0.03297	0.08571	0.05275	0.03297	0.03297	0.01538	0.00879
		704	16	600	HxB2	40.4	5.8	32.2	2.3	0.81	1.02	0.19	0.01927	0.12661	0.04679	0.01284	0.03028	0.01193	0.02752
		1294	26	600	HxB2	91.3	10.5	77.2	3.5	0.85	1.05	0.06	0.021	0.10824	0.05654	0.01939	0.02585	0.01292	0.02423
		922	16	600	R3A	44.4	3.4	40	1	0.72	0.79	0.16	0.02958	0.12254	0.05493	0.02042	0.02887	0.00915	0.02535
		1887	26	600	R3A	88.2	7.6	75.7	4.8	0.8	0.97	0.05	0.02869	0.12623	0.05574	0.03689	0.02459	0.01475	0.02541
		2666	16	600	Tybe	36.8	4.5	30.3	2	0.75	0.93	0.1	0.02055	0.12155	0.06283	0.02114	0.02701	0.02055	0.02877
		2929	26	600	Tybe	92.2	7.1	80.3	4.7	0.87	1.02	0.05	0.02424	0.13242	0.07453	0.02677	0.02279	0.0123	0.02822
Δ32/Δ32	ND235	2720	5	600	Mock	32.9	5.9	25.3	1.7	0.77	1.18	0.05	0.0159	0.1004	0.04076	0.02684	0.04573	0.0169	0.01193
		2583	13	600	Mock	31.8	5.1	24.9	1.9	0.68	0.98	0.1	0.0097	0.11315	0.04095	0.02909	0.03233	0.01509	0.02694
		2341	26	600	Mock	32.7	4.7	26.7	1.4	0.78	1.08	0.04	0.01161	0.11847	0.04297	0.02787	0.03833	0.01858	0.02207
		2035	13	600	Bk132	42.3	7.7	33	1.6	0.69	1	0.06	0.00952	0.12063	0.04868	0.02751	0.03175	0.00635	0.02646
		2105	26	600	Bk132	89.2	13.4	72.4	3.4	0.86	1.19	0.08	0.01731	0.14155	0.06976	0.02851	0.04379	0.0112	0.02648
		2398	13	600	HxB2	31.7	4.1	26	1.7	0.84	1.1	0.14	0.01397	0.12456	0.05588	0.02328	0.04191	0.00698	0.02445
		4416	26	600	HxB2	83.1	10.6	68.3	4.1	0.89	0.83	-0.04	0.0186	0.13049	0.04787	0.02597	0.04424	0.01315	0.02116
		2165	13	600	R3A	58	8.9	46	3	0.81	1.16	0.06	0.01786	0.11756	0.05208	0.02976	0.04836	0.01488	0.02455
		1686	26	600	R3A	89.7	13.2	72.6	3.7	0.83	1.16	0.07	0.02087	0.15054	0.04997	0.03163	0.04428	0.01518	0.03542
1Days refers to days post stimulation. Cells were transduced with the X4-ZFNson day 1 and HIV infected on day 5.
2Multiple refers to sequences with multiple insertions and deletions.
3Refers to disruptions shown in Figure 1B.
